# Supplementary material
Source: PubMed Central journal article supplement (PMC4150328)
Supplement: rspb20141425supp1.pdf [file rspb20141425supp1.pdf]

Figure S1.

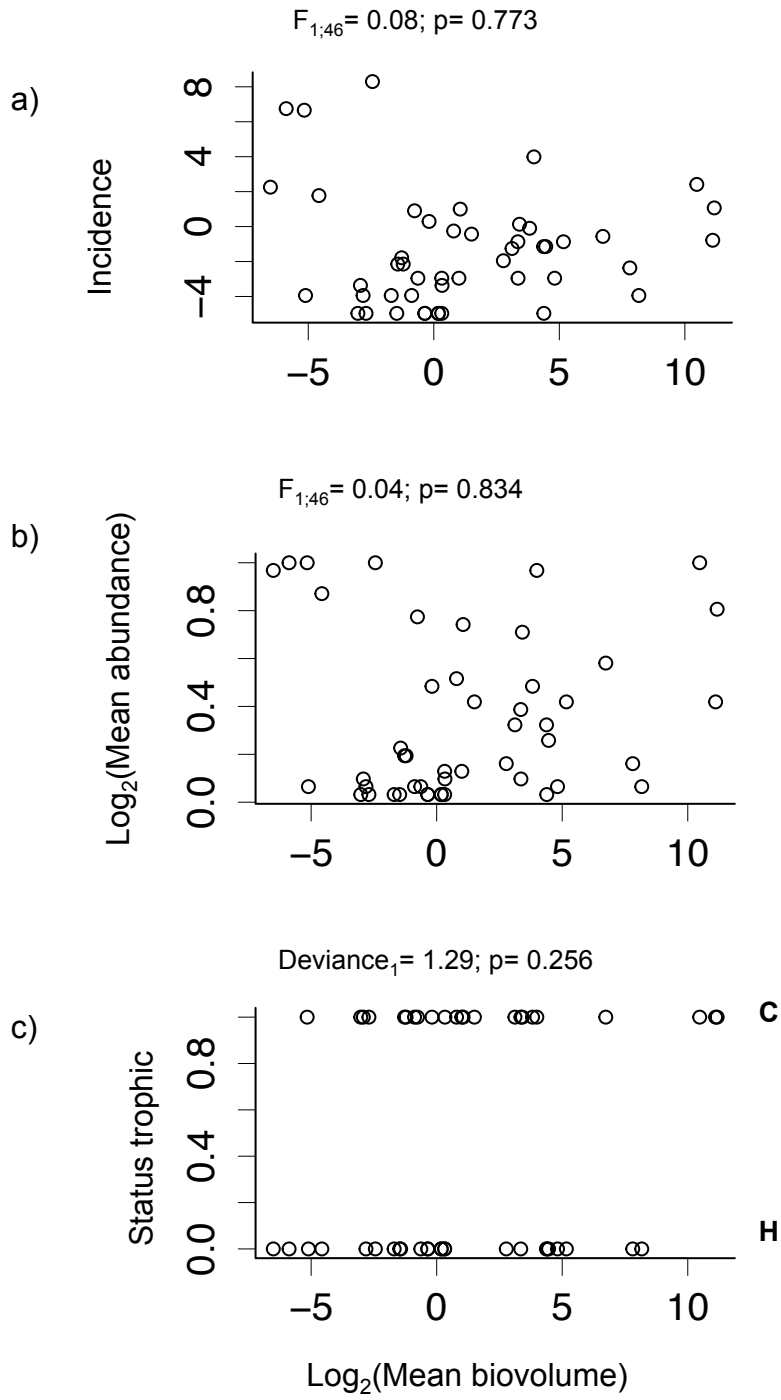

Figure S2.

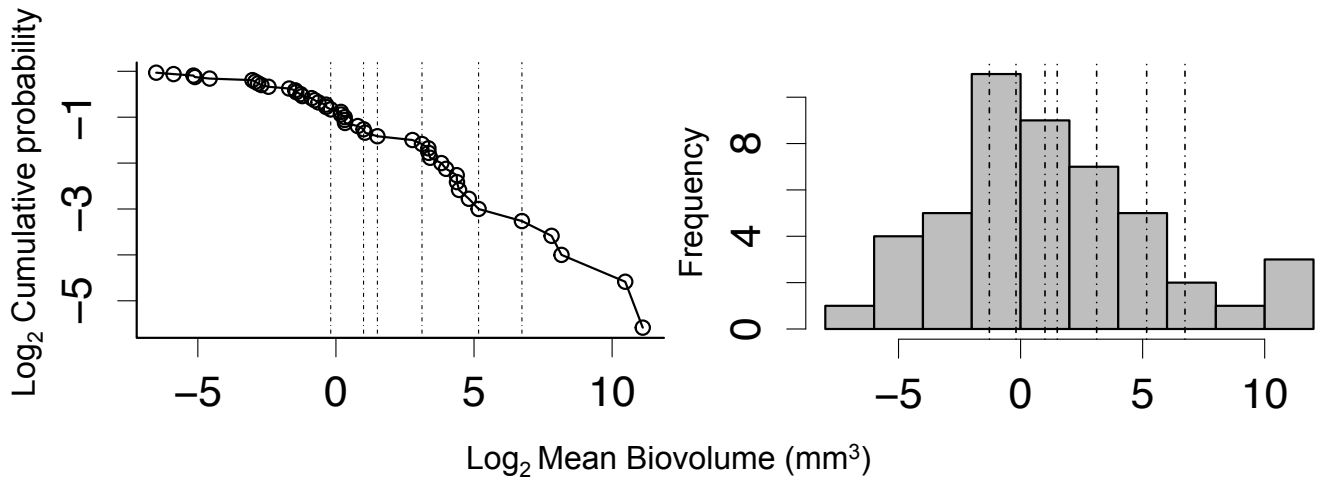

Table S1.

| Species                           | Biovolume |          | Abundance |         |         | Incidence |
|-----------------------------------|-----------|----------|-----------|---------|---------|-----------|
|                                   | Mean      | SD       | Total     | Mean    | SD      |           |
| <i>Acari sp. 1</i>                | 0,017     | 0,007    | 3336      | 107,613 | 126,581 | 1,000     |
| <i>Acari sp. 2</i>                | 0,028     | 0,022    | 3134      | 101,097 | 92,551  | 1,000     |
| <i>Acari sp. 3</i>                | 0,042     | 0,011    | 106       | 3,419   | 4,780   | 0,871     |
| <i>Amotrechidae sp</i>            | 10,651    | 10,578   | 34        | 1,097   | 0,944   | 0,710     |
| <b><i>Anyphaenidae sp*</i></b>    | 8,673     | 3,635    | 13        | 0,419   | 0,720   | 0,323     |
| <i>Araneida sp4*</i>              | 0,154     | -        | 1         | 0,032   | 0,180   | 0,032     |
| <i>Araneida sp5</i>               | 0,430     | 0,182    | 7         | 0,226   | 0,497   | 0,194     |
| <i>Araneida sp1</i>               | 0,543     | 0,061    | 2         | 0,065   | 0,250   | 0,065     |
| <i>Araneida sp2</i>               | 1,256     | 0,563    | 3         | 0,097   | 0,301   | 0,097     |
| <b><i>Araneida sp3*</i></b>       | 0,412     | 0,534    | 9         | 0,290   | 0,693   | 0,194     |
| <i>Brachistosternus matoni</i>    | 2209,878  | 1302,143 | 18        | 0,581   | 0,886   | 0,419     |
| <b><i>Chernetidae sp*</i></b>     | 0,878     | 0,766    | 38        | 1,226   | 1,586   | 0,484     |
| <i>Cicadellidae sp</i>            | 0,360     | -        | 1         | 0,032   | 0,180   | 0,032     |
| <b><i>Dorymymex sp*</i></b>       | 2,833     | 1,933    | 23        | 0,742   | 1,094   | 0,419     |
| <i>Dytiscidae sp</i>              | 0,588     | 0,431    | 58        | 1,871   | 1,258   | 0,774     |
| <i>Gelechiidae sp</i>             | 0,781     | -        | 1         | 0,032   | 0,180   | 0,032     |
| <i>Hebridae sp</i>                | 0,123     | -        | 1         | 0,032   | 0,180   | 0,032     |
| <i>Liposcelidae sp</i>            | 0,184     | 0,089    | 9755      | 314,677 | 266,056 | 1,000     |
| <i>Maindronia sp</i>              | 10,186    | 13,163   | 17        | 0,548   | 0,995   | 0,387     |
| <i>Mummucia sp</i>                | 15,869    | 35,704   | 492       | 15,871  | 11,084  | 0,968     |
| <i>Mycetophilidae sp</i>          | 1,134     | -        | 1         | 0,032   | 0,180   | 0,032     |
| <i>Mymaridae sp</i>               | 0,011     | 0,013    | 148       | 4,774   | 3,334   | 0,968     |
| <i>Nitidulidae sp1</i>            | 20,874    | -        | 1         | 0,032   | 0,180   | 0,032     |
| <i>Oonopidae sp</i>               | 0,132     | 0,009    | 3         | 0,097   | 0,301   | 0,097     |
| <i>Otitidae sp1</i>               | 1,246     | -        | 1         | 0,032   | 0,180   | 0,032     |
| <i>Otitidae sp2</i>               | 1,246     | 0,864    | 4         | 0,129   | 0,341   | 0,129     |
| <i>Philorea aracniformes</i>      | 287,375   | 0,000    | 2         | 0,065   | 0,250   | 0,065     |
| <i>Philorea maritima</i>          | 28,125    | 0,000    | 4         | 0,129   | 0,562   | 0,065     |
| <i>Philorea sp1</i>               | 224,125   | 199,092  | 6         | 0,194   | 0,477   | 0,161     |
| <i>Philorea sp2</i>               | 20,741    | 4,913    | 14        | 0,452   | 0,850   | 0,323     |
| <b><i>Philorea sp3*</i></b>       | 35,881    | 6,627    | 17        | 0,548   | 0,723   | 0,419     |
| <i>Phrynosaura reichei</i>        | 2303,820  | 1475,828 | 65        | 2,097   | 2,286   | 0,806     |
| <i>Phyllodactylus gerrhopygus</i> | 1423,042  | 802,165  | 165       | 5,323   | 4,331   | 1,000     |
| <i>Physogaster sp</i>             | 21,977    | 8,911    | 14        | 0,452   | 0,961   | 0,258     |
| <i>Platnickia sp</i>              | 14,098    | 9,962    | 29        | 0,935   | 1,289   | 0,484     |
| <i>Pteromalidae sp</i>            | 0,142     | 0,077    | 2         | 0,065   | 0,250   | 0,065     |
| <i>Salticidae sp1</i>             | 2,075     | 1,292    | 62        | 2,000   | 2,066   | 0,742     |
| <i>Scatopsidae sp</i>             | 0,309     | 0,076    | 2         | 0,065   | 0,359   | 0,032     |
| <i>Sciaridae sp</i>               | 0,029     | 0,000    | 2         | 0,065   | 0,250   | 0,065     |
| <b><i>Sicarius sp1*</i></b>       | 106,499   | 48,621   | 21        | 0,677   | 0,653   | 0,581     |
| <b><i>Sicarius sp2*</i></b>       | 2,001     | 2,082    | 4         | 0,129   | 0,341   | 0,129     |
| <i>Tenebrionidae</i>              | 6,828     | 0,000    | 8         | 0,258   | 0,773   | 0,161     |
| <i>Tephritidae sp</i>             | 1,134     | -        | 1         | 0,032   | 0,180   | 0,032     |
| <i>Thiodina cf. nicoleti</i>      | 1,730     | 0,951    | 26        | 0,839   | 1,098   | 0,516     |
| <i>Tineidae sp</i>                | 0,781     | -        | 1         | 0,032   | 0,180   | 0,032     |
| <i>Trichoptera sp</i>             | 0,370     | 0,055    | 7         | 0,226   | 0,425   | 0,226     |
| <i>Trupanea sp</i>                | 0,645     | 0,273    | 4         | 0,129   | 0,562   | 0,065     |
| <i>Unicorn sp</i>                 | 10,239    | 10,684   | 4         | 0,129   | 0,428   | 0,097     |

Table S2.

| Models    |            |                       | AIC   | pseudo-R <sup>2</sup> | p            |
|-----------|------------|-----------------------|-------|-----------------------|--------------|
| Biovolume | Biovolume2 | Carnivorous           | 38.30 | <b>0.24</b>           | <b>0.023</b> |
|           |            | Carnivorous           | 38.80 | 0.12                  | 0.024        |
|           | Biovolume2 | Carnivorous           | 39.07 | 0.17                  | 0.033        |
|           |            | Carnivorous           | 40.56 | 0.13                  | 0.077        |
| Biovolume |            | Carnivorous           | 40.63 | 0.13                  | 0.072        |
|           |            | Carnivorous Abundance | 40.77 | 0.13                  | 0.080        |
